# Supplementary material
Source: bioRxiv or medRxiv preprint supplement (https://www.medrxiv.org/highwire/filestream/73602/field_highwire_adjunct_files/0/2020.03.11.20034439-1.pdf)
Supplement: Supplementary file [file 2020.03.11.20034439-1.pdf]

## **Supplemental material**

Supplement to: Improving prognosis of surrogate assay for breast cancer patients by absolute quantitation of Ki67 protein levels using Quantitative Dot Blot (QDB) method

Supplemental figures

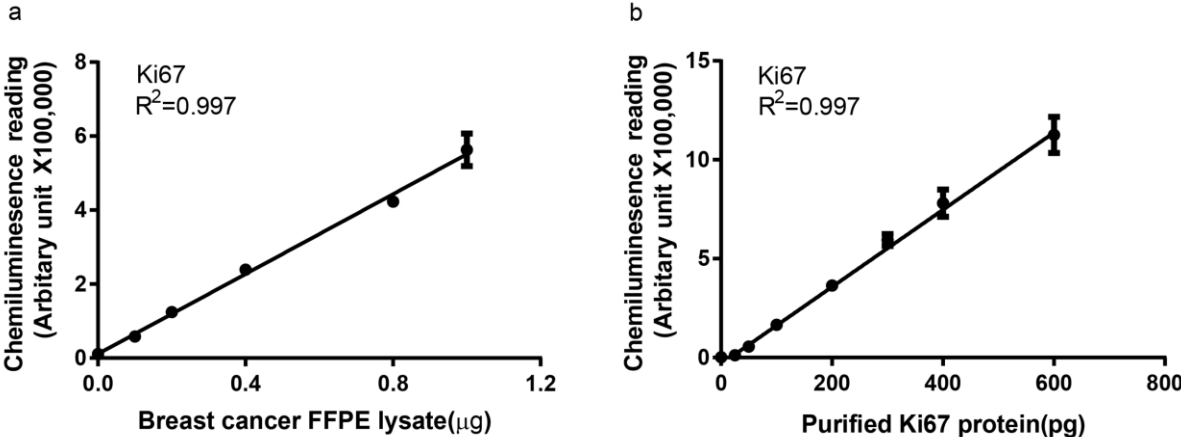

Supplemental Fig. 1: Defining the linear range of QDB measurement with Ki67 (clone MIB1).

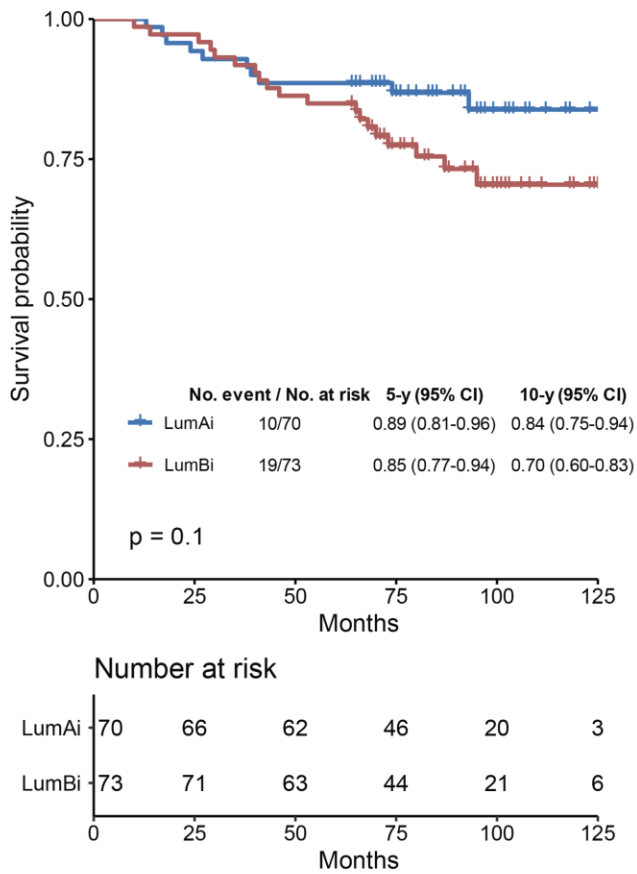

Supplemental Fig. 2: Kaplan-Meier curves for overall survival according to breast cancer subtypes assigned by surrogate assay in Luminal-like subtypes. The cutoff of Ki67 score was 20%. The 5 year and 10 year survival probabilities, and the p values from Log Rank test were provided for both Surrogate assay and Adjusted Surrogate assay respectively. LumA<sub>i</sub> and LumB<sub>i</sub>, Luminal A-like and B-like subtypes by surrogate assay; CI, confidence interval.

## Supplemental tables

**Supplemental Table 1. Characteristics of 12 specimens lost to follow up**

| <b>Characteristics</b>                   | <b>Number of Cases (%)</b> |
|------------------------------------------|----------------------------|
| <b>Age</b>                               |                            |
| <50                                      | 6(50)                      |
| ≥50                                      | 6(50)                      |
| <b>Treatment</b>                         |                            |
| Chemo                                    | 5(41.67)                   |
| Endo&Chemo                               | 5(41.67)                   |
| Unknown                                  | 2(16.67)                   |
| <b>Node Status</b>                       |                            |
| N0                                       | 10(83.33)                  |
| N2                                       | 1(8.33)                    |
| N3                                       | 1(8.33)                    |
| <b>Tumor Size</b>                        |                            |
| T1                                       | 4(33.33)                   |
| T2                                       | 8(66.67)                   |
| <b>Grade</b>                             |                            |
| II                                       | 6(50)                      |
| III                                      | 5(41.67)                   |
| Unknown                                  | 1(8.33)                    |
| <b>Surrogate Assay (14% Ki67 cutoff)</b> |                            |
| LumA <sub>i</sub>                        | 5(41.67)                   |
| LumB <sub>i</sub>                        | 7(57.33)                   |
| LumB <sub>1i</sub>                       | 5(41.67)                   |
| LumB <sub>2i</sub>                       | 2(16.67)                   |
| <b>Surrogate Assay (20% Ki67 cutoff)</b> |                            |
| LumA <sub>i</sub>                        | 6(50)                      |
| LumB <sub>i</sub>                        | 6(50)                      |
| LumB <sub>1i</sub>                       | 4(33.33)                   |
| LumB <sub>2i</sub>                       | 2(16.67)                   |
| <b>Adjusted Surrogate Assay</b>          |                            |
| LumA <sub>q</sub>                        | 7(58.33)                   |
| LumB <sub>q</sub>                        | 5(41.67)                   |
| <b>Group</b>                             |                            |
| A <sub>i</sub> A <sub>q</sub>            | 4(33.33)                   |
| A <sub>i</sub> B <sub>q</sub>            | 1(8.33)                    |
| B <sub>i</sub> A <sub>q</sub>            | 3(25)                      |
| B <sub>i</sub> B <sub>q</sub>            | 4(33.33)                   |
